# Supplementary material for: Social Media Use: Awareness of Covid-19 Vaccine and Acceptance among Undergraduate Students in Kano State, Nigeria
Source: Research Square preprint supplement (doi:10.21203/rs.3.rs-3146725/v1), 2023-07-12

**APPENDIX**

1. Table. 1.1

| **Gender** | | | | | |
| --- | --- | --- | --- | --- | --- |
|  | | Frequency | Percent | Valid Percent | Cumulative Percent |
| Valid | Male | 75 | 51.7 | 51.7 | 51.7 |
| Female | 70 | 48.3 | 48.3 | 100.0 |
| Total | 145 | 100.0 | 100.0 |  |

The table 1.1 above indicates that 51.7% of the respondents are male, while 48.3 are female. This, therefore, implies that there is gender balance in the study. The results indicated an almost equal representation of males and females (Al-Naam et al., 2022).

1. Table 1.2

| **Age** | | | | | |
| --- | --- | --- | --- | --- | --- |
|  | | Frequency | Percent | Valid Percent | Cumulative Percent |
| Valid | 18-25 | 111 | 76.6 | 76.6 | 76.6 |
| 26-35 | 33 | 22.8 | 22.8 | 99.3 |
| 36-45 | 1 | .7 | .7 | 100.0 |
| Total | 145 | 100.0 | 100.0 |  |

Table 1.2 above indicates that 76.6% of the respondents are between the ages of 18-25, while those between the ages of 26-35 constitute 22.8% of the respondents. Only 0.7% are between 36 and 45 years old. The result reflects the average age of undergraduates.

1. Table. 1.3

| **Level** | | | | | |
| --- | --- | --- | --- | --- | --- |
|  | | Frequency | Percent | Valid Percent | Cumulative Percent |
| Valid | Level 1 | 14 | 9.7 | 9.7 | 9.7 |
| Level 2 | 88 | 60.7 | 60.7 | 70.3 |
| Level 3 | 13 | 9.0 | 9.0 | 79.3 |
| Level 4 | 30 | 20.7 | 20.7 | 100.0 |
| Total | 145 | 100.0 | 100.0 |  |

| **University of Study** | | | | | |
| --- | --- | --- | --- | --- | --- |
|  | | Frequency | Percent | Valid Percent | Cumulative Percent |
| Valid | Bayero University Kano | 102 | 70.3 | 70.3 | 70.3 |
| North West University | 3 | 2.1 | 2.1 | 72.4 |
| Skyline University Nigeria | 40 | 27.6 | 27.6 | 100.0 |
| Total | 145 | 100.0 | 100.0 |  |

**Table 2: Social media use and vaccine acceptance**

1. **Table. 2.1**

| **Social Media account** | | | | | |
| --- | --- | --- | --- | --- | --- |
|  | | Frequency | Percent | Valid Percent | Cumulative Percent |
| Valid | Yes | 143 | 98.6 | 98.6 | 98.6 |
| No | 1 | .7 | .7 | 99.3 |
| 11.00 | 1 | .7 | .7 | 100.0 |
| Total | 145 | 100.0 | 100.0 |  |

Table 2.1 above indicates that 98.6% of the respondents have social media account, while only 1 respondent representing 0.7% of the respondents claimed not to have social media account. The implication is that social media is a cogent tool for creating awareness about the vaccine.

1. Table 2.2

| **Hours spent on Social Media** | | | | | |
| --- | --- | --- | --- | --- | --- |
|  | | Frequency | Percent | Valid Percent | Cumulative Percent |
| Valid | 0-1 hour | 12 | 8.3 | 8.3 | 8.3 |
| 1-2 hours | 10 | 6.9 | 6.9 | 15.2 |
| 2-3 hours | 25 | 17.2 | 17.2 | 32.4 |
| 3-4 hours | 24 | 16.6 | 16.6 | 49.0 |
| 4-5 hours | 24 | 16.6 | 16.6 | 65.5 |
| 5 and above hours | 50 | 34.5 | 34.5 | 100.0 |
| Total | 145 | 100.0 | 100.0 |  |

The result in table 2.2 reveals that 34.5% of the respondents spend 5 hours and above navigating across social networking sites. 17.2% spend 2-3 hours, while 16.6 spend 4-5 hour and 3-4 hours each. This implies that the respondents are relatively heavy social media users.

1. Table: 2.3

| **Information about Covid-19vaccine on the social media** | | | | | |
| --- | --- | --- | --- | --- | --- |
|  | | Frequency | Percent | Valid Percent | Cumulative Percent |
| Valid | Yes | 118 | 81.4 | 81.4 | 81.4 |
| No | 11 | 7.6 | 7.6 | 89.0 |
| May be | 16 | 11.0 | 11.0 | 100.0 |
| Total | 145 | 100.0 | 100.0 |  |

Table 2.3 above indicates that 81.4% of the respondents consume information about the Covid-19 on social media, while 11% per cent are undecided. This shows that social media is used to spread news and information about the Covid-19 vaccine. Social media was the most utilized source for information on the disease (n=4740, 83.5%), followed by the World Health Organization (n=2844, 50.1%) (Ali et al., 2020).

1. Table: 2.4

| **Major of Information about the Covid-19 Vaccine** | | | | | |
| --- | --- | --- | --- | --- | --- |
|  | | Frequency | Percent | Valid Percent | Cumulative Percent |
| Valid | Television | 17 | 11.7 | 11.7 | 11.7 |
| Radio | 8 | 5.5 | 5.5 | 17.2 |
| Newspaper and Magazine | 1 | .7 | .7 | 17.9 |
| Social media | 109 | 75.2 | 75.2 | 93.1 |
| People's mouth | 10 | 6.9 | 6.9 | 100.0 |
| Total | 145 | 100.0 | 100.0 |  |

Information in table 2.4 above suggests social media is the major source of information for 75.2% of the respondents. Television is the major source of information about Covid-19 vaccine to only 11.7%, followed by people and radio with6.9% and 5.5% respectively. This means that the social media, if harnessed, is a potential avenue for sensitising people about the Covid-19 vaccine.

**3. Awareness of Covid-19 vaccine**

1. Table: 3.1

| **Are you aware of Covid-19 vaccine?** | | | | | |
| --- | --- | --- | --- | --- | --- |
|  | | Frequency | Percent | Valid Percent | Cumulative Percent |
| Valid | Yes | 141 | 97.2 | 97.2 | 97.2 |
| No | 2 | 1.4 | 1.4 | 98.6 |
| May be | 2 | 1.4 | 1.4 | 100.0 |
| Total | 145 | 100.0 | 100.0 |  |

The result in table 3.1 above indicates that 92% of the respondents are aware of the Covid-19 vaccine. While only 2 respondents constituting 1.4% of the respondents are not aware of the vaccine. Moreover, 1.4% remained undecided. This implies that there is adequate awareness of the Covid-19 vaccine among the students. It also indicates that use of social media played a significant role in awareness of the vaccine. Adetayo et al., (2021) conclude that knowledge of COVID-19 vaccines is positively associated with intent to receive the jab. Similarly, Betsch et al., (2019) suggest that new approaches should be employed to curtail practical barriers as a measure to improve vaccine uptake.

Table: 3.2

| **Do you know that the Vaccine is free?** | | | | | |
| --- | --- | --- | --- | --- | --- |
|  | | Frequency | Percent | Valid Percent | Cumulative Percent |
| Valid | Yes | 104 | 71.7 | 71.7 | 71.7 |
| No | 33 | 22.8 | 22.8 | 94.5 |
| May be | 8 | 5.5 | 5.5 | 100.0 |
| Total | 145 | 100.0 | 100.0 |  |

The result in the table 3.2 reveals that know that 71.7% of the vaccine is free of charge, while 22.8% of the respondents do not know. The remaining 5.5 of the respondent are undecided. That means that, the students are only aware of vaccine exercise, but are also conscious of the fact that the vaccine is free. Su et al., (2020) found availability of the Covid-19 vaccine is inversely associated with its adoption. Hence suggest a deep understanding of the consumers of the vaccine to determine the strategies needed required for ensuring a satisfactory vaccination rates and to safeguard society at large.

1. Table: 3.3

| **How did you get to know about Covid-19 vaccine?** | | | | | |
| --- | --- | --- | --- | --- | --- |
|  | | Frequency | Percent | Valid Percent | Cumulative Percent |
| Valid | People's Mouth | 22 | 15.2 | 15.2 | 15.2 |
| Online Media | 32 | 22.1 | 22.1 | 37.2 |
| offline Media | 6 | 4.1 | 4.1 | 41.4 |
| Social Media | 78 | 53.8 | 53.8 | 95.2 |
| Other Sources | 7 | 4.8 | 4.8 | 100.0 |
| Total | 145 | 100.0 | 100.0 |  |

The table 3.3 above shows that 53.8% got the information about the vaccine through social media, 22.1% got it through other online sources while 15.2 got the information through peer to peer discussion.

1. Table: 3.4

| **Do you know where to get the vaccine?** | | | | | |
| --- | --- | --- | --- | --- | --- |
|  | | Frequency | Percent | Valid Percent | Cumulative Percent |
| Valid | Yes | 94 | 64.8 | 64.8 | 64.8 |
| No | 51 | 35.2 | 35.2 | 100.0 |
| Total | 145 | 100.0 | 100.0 |  |

The table 3.4 above indicates that 64.8% of the respondents know the Covid-19 vaccine centres, while 35.2% of the students do not know the centres.

**4. Covid-19 vaccine acceptance**

1. Table: 4.1

| **Have you ever received the Covid19 vaccine?** | | | | | |
| --- | --- | --- | --- | --- | --- |
|  | | Frequency | Percent | Valid Percent | Cumulative Percent |
| Valid | 1 yes | 51 | 35.2 | 35.2 | 35.2 |
| 2 No | 94 | 64.8 | 64.8 | 100.0 |
| Total | 145 | 100.0 | 100.0 |  |

The result in the table 4.1 indicates that only 35.2% of the respondents received the Covid-19 vaccine, while 64.8% were not vaccinated. This means the acceptability of the vaccine is nothing to write home about. Adetayo et al., (2021) found in a similar study that students’ intent to vaccinate was higher than average, with just a few already vaccinated.

1. Table: 4.1.1

| **Did you take the Vaccine willingly?** | | | | | |
| --- | --- | --- | --- | --- | --- |
|  | | Frequency | Percent | Valid Percent | Cumulative Percent |
| Valid |  | 94 | 64.8 | 64.8 | 64.8 |
| 1 | 39 | 26.9 | 26.9 | 91.7 |
| 2 | 7 | 4.8 | 4.8 | 96.6 |
| 3 | 5 | 3.4 | 3.4 | 100.0 |
| Total | 145 | 100.0 | 100.0 |  |

Table 4.1.1 indicates that 26.9% out of the 35.2% that received jab were vaccinated willingly, while 4.8% of them were influenced to receive the inoculants.

1. Table: 4.1.2

| **I was forced at my working place/school/Church to take the Covid-19 Vaccine.** | | | | | |
| --- | --- | --- | --- | --- | --- |
|  | | Frequency | Percent | Valid Percent | Cumulative Percent |
| Valid |  | 94 | 64.8 | 64.8 | 64.8 |
| 1 | 10 | 6.9 | 6.9 | 71.7 |
| 2 | 16 | 11.0 | 11.0 | 82.8 |
| 3 | 11 | 7.6 | 7.6 | 90.3 |
| 4 | 10 | 6.9 | 6.9 | 97.2 |
| 5 | 4 | 2.8 | 2.8 | 100.0 |
| Total | 145 | 100.0 | 100.0 |  |

1. Table: 4.1.3

| **I received the Covid-19 vaccine to:** | | | | | |
| --- | --- | --- | --- | --- | --- |
|  | | Frequency | Percent | Valid Percent | Cumulative Percent |
| Valid |  | 94 | 64.8 | 64.8 | 64.8 |
| 1 Travelling visa | 11 | 7.6 | 7.6 | 72.4 |
| 2 To meet office requirement | 3 | 2.1 | 2.1 | 74.5 |
| 3 To protect me against the disease | 36 | 24.8 | 24.8 | 99.3 |
| 5 Because a friend did. | 1 | .7 | .7 | 100.0 |
| Total | 145 | 100.0 | 100.0 |  |

Table 4.1.2 reveals that 24.8% of those of the respondents that received the jab, received it to protect themselves against the Covid-19, while 7.6% of them received it to obtain a travel visa. Only 2.1% were vaccinated to meet office requirement, while 0.7% accepted the jab because A did. The implication is that vaccine was accepted because the respondents wanted to against the disease. More so, it also suggests that they belief in the vaccine.

1. Table: 4.1.4

| **I trust the creators of the vaccine.** | | | | | |
| --- | --- | --- | --- | --- | --- |
|  | | Frequency | Percent | Valid Percent | Cumulative Percent |
| Valid |  | 94 | 64.8 | 64.8 | 64.8 |
| 1 | 3 | 2.1 | 2.1 | 66.9 |
| 2 | 3 | 2.1 | 2.1 | 69.0 |
| 3 | 14 | 9.7 | 9.7 | 78.6 |
| 4 | 27 | 18.6 | 18.6 | 97.2 |
| 5 | 4 | 2.8 | 2.8 | 100.0 |
| Total | 145 | 100.0 | 100.0 |  |

1. Table: 4.1.5

| **I trust the efficacy of Covid19 vaccine.** | | | | | |
| --- | --- | --- | --- | --- | --- |
|  | | Frequency | Percent | Valid Percent | Cumulative Percent |
| Valid |  | 94 | 64.8 | 64.8 | 64.8 |
| 1 | 4 | 2.8 | 2.8 | 67.6 |
| 2 | 1 | .7 | .7 | 68.3 |
| 3 | 16 | 11.0 | 11.0 | 79.3 |
| 4 | 26 | 17.9 | 17.9 | 97.2 |
| 5 | 4 | 2.8 | 2.8 | 100.0 |
| Total | 145 | 100.0 | 100.0 |  |

Table 4.1.6 shows that 17.9% out of the 35.2% that were vaccinated agreed with the efficacy of the vaccine, while 2.8 strongly agreed. 11% of them were undecided, while only 2.8% strongly disagreed. The result means that their decision to accept the jab was informed by their trust in the efficacy of the vaccine.

1. Table: 4.1.6

| **I trust Covid-19 vaccine recommended by government.** | | | | | |
| --- | --- | --- | --- | --- | --- |
|  | | Frequency | Percent | Valid Percent | Cumulative Percent |
| Valid |  | 94 | 64.8 | 64.8 | 64.8 |
| 1 | 3 | 2.1 | 2.1 | 66.9 |
| 3 | 13 | 9.0 | 9.0 | 75.9 |
| 4 | 31 | 21.4 | 21.4 | 97.2 |
| 5 | 4 | 2.8 | 2.8 | 100.0 |
| Total | 145 | 100.0 | 100.0 |  |

**Covid-19 Refusal**

| **Receiving Covid-19 vaccine.** | | | | | |
| --- | --- | --- | --- | --- | --- |
|  | | Frequency | Percent | Valid Percent | Cumulative Percent |
| Valid | Yes | 51 | 35.2 | 35.2 | 35.2 |
| No | 94 | 64.8 | 64.8 | 100.0 |
| Total | 145 | 100.0 | 100.0 |  |

**4.2 Refusal to accept Covid-19 Vaccine**

19. Table: 4.2.1

| **I hate vaccination.** | | | | | |
| --- | --- | --- | --- | --- | --- |
|  | | Frequency | Percent | Valid Percent | Cumulative Percent |
| Valid | Strongly Disagree | 1 | .7 | 1.1 | 1.1 |
| Disagree | 17 | 11.7 | 18.1 | 19.1 |
| Neutral | 47 | 32.4 | 50.0 | 69.1 |
| Agree | 21 | 14.5 | 22.3 | 91.5 |
| Strongly Agree | 8 | 5.5 | 8.5 | 100.0 |
| Total | 94 | 64.8 | 100.0 |  |
| Missing | System | 51 | 35.2 |  |  |
| Total | | 145 | 100.0 |  |  |

Table 4.2.1 shows that 32.4% out of the 64.8% that refused to be vaccinated decided not to reveal whether or not they hate vaccination. However, 14.2% and 5.5% agreed and strongly agreed respectively. While 11.7% and 0.7% disagreed and strongly disagreed respectively.

1. Table: 4.2.2

| **I will receive the Covid-19 vaccines later.** | | | | | |
| --- | --- | --- | --- | --- | --- |
|  | | Frequency | Percent | Valid Percent | Cumulative Percent |
| Valid | Strongly Disagree | 11 | 7.6 | 11.7 | 11.7 |
| Disagree | 20 | 13.8 | 21.3 | 33.0 |
| Neutral | 34 | 23.4 | 36.2 | 69.1 |
| Agree | 29 | 20.0 | 30.9 | 100.0 |
| Total | 94 | 64.8 | 100.0 |  |
| Missing | System | 51 | 35.2 |  |  |
| Total | | 145 | 100.0 |  |  |

The result in table 4.2.2 indicates that 20% out of the 64.8% that did not receive the vaccine showed interest in receiving the jab later. While 23,.4% of them remained undecided, 13.8% and 7.6% disagreed and strongly disagreed with the idea of receiving the vaccine. This implies that other than reason rejection is responsible for the non-reception of the vaccine.

1. Table: 4.2.3

| **Will you advise friends or family members to take the vaccine?** | | | | | |
| --- | --- | --- | --- | --- | --- |
|  | | Frequency | Percent | Valid Percent | Cumulative Percent |
| Valid | Yes | 45 | 31.0 | 47.9 | 47.9 |
| No | 49 | 33.8 | 52.1 | 100.0 |
| Total | 94 | 64.8 | 100.0 |  |
| Missing | System | 51 | 35.2 |  |  |
| Total | | 145 | 100.0 |  |  |

Table 4.2.3 above shows that 33.8% out of 64.8% that were not vaccinated will not recommend the vaccine to their family members, while almost half of them 31.0% will recommend it the inoculants to their family members. This reveals that there is no total rejection of the vaccine despite the low turnout.

1. Table: 4.2.4

| **My religion forbids vaccine.** | | | | | |
| --- | --- | --- | --- | --- | --- |
|  | | Frequency | Percent | Valid Percent | Cumulative Percent |
| Valid | Strongly Disagree | 33 | 22.8 | 35.1 | 35.1 |
| Disagree | 44 | 30.3 | 46.8 | 81.9 |
| Neutral | 14 | 9.7 | 14.9 | 96.8 |
| Agree | 3 | 2.1 | 3.2 | 100.0 |
| Total | 94 | 64.8 | 100.0 |  |
| Missing | System | 51 | 35.2 |  |  |
| Total | | 145 | 100.0 |  |  |

Table 4.2.4 above indicates that religion is not responsible for the low turnout in regards to the vaccination as 30.3% and 22.8% of those not vaccinated disagreed and strongly disagreed respectively. While 9.7% of them remained undecided, only 2.1% have religion as a reason for declining the Covid-19 vaccine. Contrarily, Lucia et al., (2020) found that actors that discourage vaccination and concern in vaccination acceptance is greatly influence by religiosity.

1. Table: 4.2.5

| **Covid-19 Vaccine leads to infertility.** | | | | | |
| --- | --- | --- | --- | --- | --- |
|  | | Frequency | Percent | Valid Percent | Cumulative Percent |
| Valid | Strongly Disagree | 2 | 1.4 | 2.1 | 2.1 |
| Disagree | 4 | 2.8 | 4.3 | 6.4 |
| Neutral | 46 | 31.7 | 48.9 | 55.3 |
| Agree | 33 | 22.8 | 35.1 | 90.4 |
| Strongly Agree | 9 | 6.2 | 9.6 | 100.0 |
| Total | 94 | 64.8 | 100.0 |  |
| Missing | System | 51 | 35.2 |  |  |
| Total | | 145 | 100.0 |  |  |

The table 4.2.5 above revealed that, 22.8% out of the 64.8% of the respondents that did not receive the Covid-19 vaccine are agreed, while 6.2% strongly agreed that Covid-19 vaccine leads to infertility. However, a significant percentage of the 31.7 remained neutral, while 2.8% and 1.4% disagreed and strongly disagreed respectively.

1. Table:4.2.6

| **Covid-19 vaccines given to African countries are not safe.** | | | | | |
| --- | --- | --- | --- | --- | --- |
|  | | Frequency | Percent | Valid Percent | Cumulative Percent |
| Valid | Strongly Disagree | 7 | 4.8 | 7.4 | 7.4 |
| Disagree | 22 | 15.2 | 23.4 | 30.9 |
| Neutral | 45 | 31.0 | 47.9 | 78.7 |
| Agree | 11 | 7.6 | 11.7 | 90.4 |
| Strongly Agree | 9 | 6.2 | 9.6 | 100.0 |
| Total | 94 | 64.8 | 100.0 |  |
| Missing | System | 51 | 35.2 |  |  |
| Total | | 145 | 100.0 |  |  |

The table 4.2.6 above indicates 15.2% out of the 64.8% that did not take the vaccine disagreed, while, 7.4% of them strongly disagreed that the vaccine given to Africans is not safe. While 7.6% and 6.2% agreed and strongly agreed respectively with unsafely of the vaccine given to Africans. However, a large percentage constituting 31.0 decided to be neutral. The implication is that the respondents trust the vaccine.

1. Table: 4.2.7

| **I do not trust any vaccine produced by white man.** | | | | | |
| --- | --- | --- | --- | --- | --- |
|  | | Frequency | Percent | Valid Percent | Cumulative Percent |
| Valid | Strongly Disagree | 4 | 2.8 | 4.3 | 4.3 |
| Disagree | 35 | 24.1 | 37.2 | 41.5 |
| Neutral | 36 | 24.8 | 38.3 | 79.8 |
| Agree | 12 | 8.3 | 12.8 | 92.6 |
| Strongly Agree | 7 | 4.8 | 7.4 | 100.0 |
| Total | 94 | 64.8 | 100.0 |  |
| Missing | System | 51 | 35.2 |  |  |
| Total | | 145 | 100.0 |  |  |

Table 4.2.7 indicates that 24.1% and 2,8% out of the 64.8% that did not take the vaccine, trust the vaccine produced by white man. While 8.3% and 4.8% agreed and strongly agreed respectively. However, 24.8% decided to be neutral. This means that the respondents trust the vaccine produced by Whiteman.

1. Table: 4.2.8

| **The vaccine is risky infested.** | | | | | |
| --- | --- | --- | --- | --- | --- |
|  | | Frequency | Percent | Valid Percent | Cumulative Percent |
| Valid | Strongly Disagree | 4 | 2.8 | 4.3 | 4.3 |
| Disagree | 23 | 15.9 | 24.5 | 28.7 |
| Neutral | 42 | 29.0 | 44.7 | 73.4 |
| Agree | 13 | 9.0 | 13.8 | 87.2 |
| Strongly Agree | 12 | 8.3 | 12.8 | 100.0 |
| Total | 94 | 64.8 | 100.0 |  |
| Missing | System | 51 | 35.2 |  |  |
| Total | | 145 | 100.0 |  |  |

Table 4.2.8 indicates that 15.9% and 2.8% out of the 64.8% strongly disagreed and disagreed that the vaccine is risky infested. Moreover, 9.0% and 8.3% agreed and strongly agreed that the vaccine is risky infested. However, a large percentage constituting 29.0% did not decide.

**Inferential analysis**

| **Correlations** | | | | |
| --- | --- | --- | --- | --- |
|  | | Are you aware of Covid-19 vaccine? | How important is covid 19 vaccine to you? | Receiving Covid 19 vaccine. |
| Are you aware of Covid-19 vaccine? | Pearson Correlation | 1 | .151 | .006 |
| Sig. (2-tailed) |  | .069 | .942 |
| N | 145 | 145 | 145 |
| How important is Covid-19 vaccine to you? | Pearson Correlation | .151 | 1 | .367** |
| Sig. (2-tailed) | .069 |  | .000 |
| N | 145 | 145 | 145 |
| Receiving Covid-19 vaccine. | Pearson Correlation | .006 | .367** | 1 |
| Sig. (2-tailed) | .942 | .000 |  |
| N | 145 | 145 | 145 |
| **. Correlation is significant at the 0.01 level (2-tailed). | | | | |

The results show a strong Correlational significance 0.001 level between awareness of the Covid-19 vaccine, accepting its importance and reception of the vaccine.

| **Hours spent on Social Media * Receiving Covid-19 vaccine. Cross tabulation** | | | | |
| --- | --- | --- | --- | --- |
| Count | | | | |
|  | | Receiving Covid-19 vaccine. | | Total |
| Yes | No |
| Hours spent on Social Media | 0-1 hour | 2 | 10 | 12 |
| 1-2 hours | 3 | 7 | 10 |
| 2-3 hours | 11 | 14 | 25 |
| 3-4 hours | 7 | 17 | 24 |
| 4-5 hours | 9 | 15 | 24 |
| 5 and above hours | 19 | 31 | 50 |
| Total | | 51 | 94 | 145 |

A cross tabulation hour spent on social media and receiving Covid-19 vaccine indicates that those spending 5 and above hours on social media are the highest receivers of the Covid-19 jab.

| **Receiving Covid-19 vaccine. * Major source of Information about the Covid-19 Vaccine Cross tabulation** | | | | | | | |
| --- | --- | --- | --- | --- | --- | --- | --- |
| Count | | | | | | | |
|  | | Major of Information about the Covid-19 Vaccine | | | | | Total |
| Television | Radio | Newspaper and Magazine | Social media | People's mouth |
| Receiving Covid-19 vaccine. | Yes | 6 | 3 | 1 | 39 | 2 | 51 |
| No | 11 | 5 | 0 | 70 | 8 | 94 |
| Total | | 17 | 8 | 1 | 109 | 10 | 145 |

A r**eceiving Covid-19 vaccine. * Major source of Information about the Covid-19 Vaccine Cross tabulation shows that those receiving information on social media receive the covid 19 vaccine most.**

| **Correlations** | | | | |
| --- | --- | --- | --- | --- |
|  | | Are you aware of Covid-19 vaccine? | How important is covid 19 vaccine to you? | Receiving Covid 19 vaccine. |
| Are you aware of Covid-19 vaccine? | Pearson Correlation | 1 | .151 | .006 |
| Sig. (2-tailed) |  | .069 | .942 |
| N | 145 | 145 | 145 |
| How important is covid 19 vaccine to you? | Pearson Correlation | .151 | 1 | .367** |
| Sig. (2-tailed) | .069 |  | .000 |
| N | 145 | 145 | 145 |
| Receiving Covid 19 vaccine. | Pearson Correlation | .006 | .367** | 1 |
| Sig. (2-tailed) | .942 | .000 |  |
| N | 145 | 145 | 145 |
| **. Correlation is significant at the 0.01 level (2-tailed). | | | | |

The results show a strong Correlational significance 0.001 level between awareness of the Covid-19 vaccine, accepting its importance and reception of the vaccine.

| **Hours spent on Social Media * Receiving Covid-19 vaccine. Cross tabulation** | | | | |
| --- | --- | --- | --- | --- |
| Count | | | | |
|  | | Receiving Covid-19 vaccine. | | Total |
| Yes | No |
| Hours spent on Social Media | 0-1 hour | 2 | 10 | 12 |
| 1-2 hours | 3 | 7 | 10 |
| 2-3 hours | 11 | 14 | 25 |
| 3-4 hours | 7 | 17 | 24 |
| 4-5 hours | 9 | 15 | 24 |
| 5 and above hours | 19 | 31 | 50 |
| Total | | 51 | 94 | 145 |

A cross tabulation hour spent on social media and receiving Covid-19 vaccine indicates that those spending 5 and above hours on social media are the highest receivers of the Covid-19 jab. Thus spending many hours on the social media is inversely proportional to receiving the vaccine.

| **Receiving Covid-19 vaccine. * Major source of Information about the Covid-19 Vaccine Cross tabulation** | | | | | | | |
| --- | --- | --- | --- | --- | --- | --- | --- |
| Count | | | | | | | |
|  | | Major of Information about the Covid-19 Vaccine | | | | | Total |
| Television | Radio | Newspaper and Magazine | Social media | People's mouth |
| Receiving Covid-19 vaccine. | Yes | 6 | 3 | 1 | 39 | 2 | 51 |
| No | 11 | 5 | 0 | 70 | 8 | 94 |
| Total | | 17 | 8 | 1 | 109 | 10 | 145 |

A r**eceiving Covid-19 vaccine. * Major source of Information about the Covid-19 Vaccine Cross tabulation shows that those receiving information on social media receive the Covid-19 vaccine most**

| **Gender * How often do use social media per day? Cross tabulation** | | | | | | | | |
| --- | --- | --- | --- | --- | --- | --- | --- | --- |
| Count | | | | | | | | |
|  | | How often do use social media per day? | | | | | | Total |
| 0 - 1 hour | 1 - 2 hours | 2 - 3 hours | 3 - 4 hours | 4 - 5 hours | 5 - and above hours |
| Gender | Female | 5 | 4 | 13 | 10 | 11 | 27 | 70 |
| Male | 7 | 7 | 11 | 14 | 13 | 23 | 75 |
| Total | | 12 | 11 | 24 | 24 | 24 | 50 | 145 |

| **How often do use social media per day? * Have you ever received the Covid19 vaccine? Cross tabulation** | | | | |
| --- | --- | --- | --- | --- |
| Count | | | | |
|  | | Have you ever received the Covid19 vaccine? | | Total |
| No | Yes |
| How often do use social media per day? | 0 - 1 hour | 10 | 2 | 12 |
| 1 - 2 hours | 7 | 4 | 11 |
| 2 - 3 hours | 14 | 10 | 24 |
| 3 - 4 hours | 17 | 7 | 24 |
| 4 - 5 hours | 15 | 9 | 24 |
| 5 - and above hours | 31 | 19 | 50 |
| Total | | 94 | 51 | 145 |


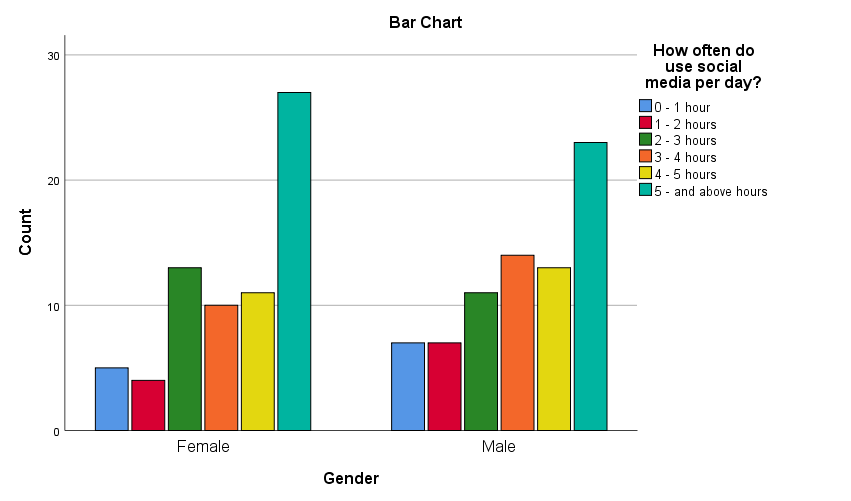

Supplement: Supplementary file 1 [file 897a7457085949606e83d1ec.docx]
